# Supplementary material
Source: PubMed Central journal article supplement (PMC11030096)
Supplement: 262_2010_909_MOESM1_ESM.pdf [file 262_2010_909_MOESM1_ESM.pdf]

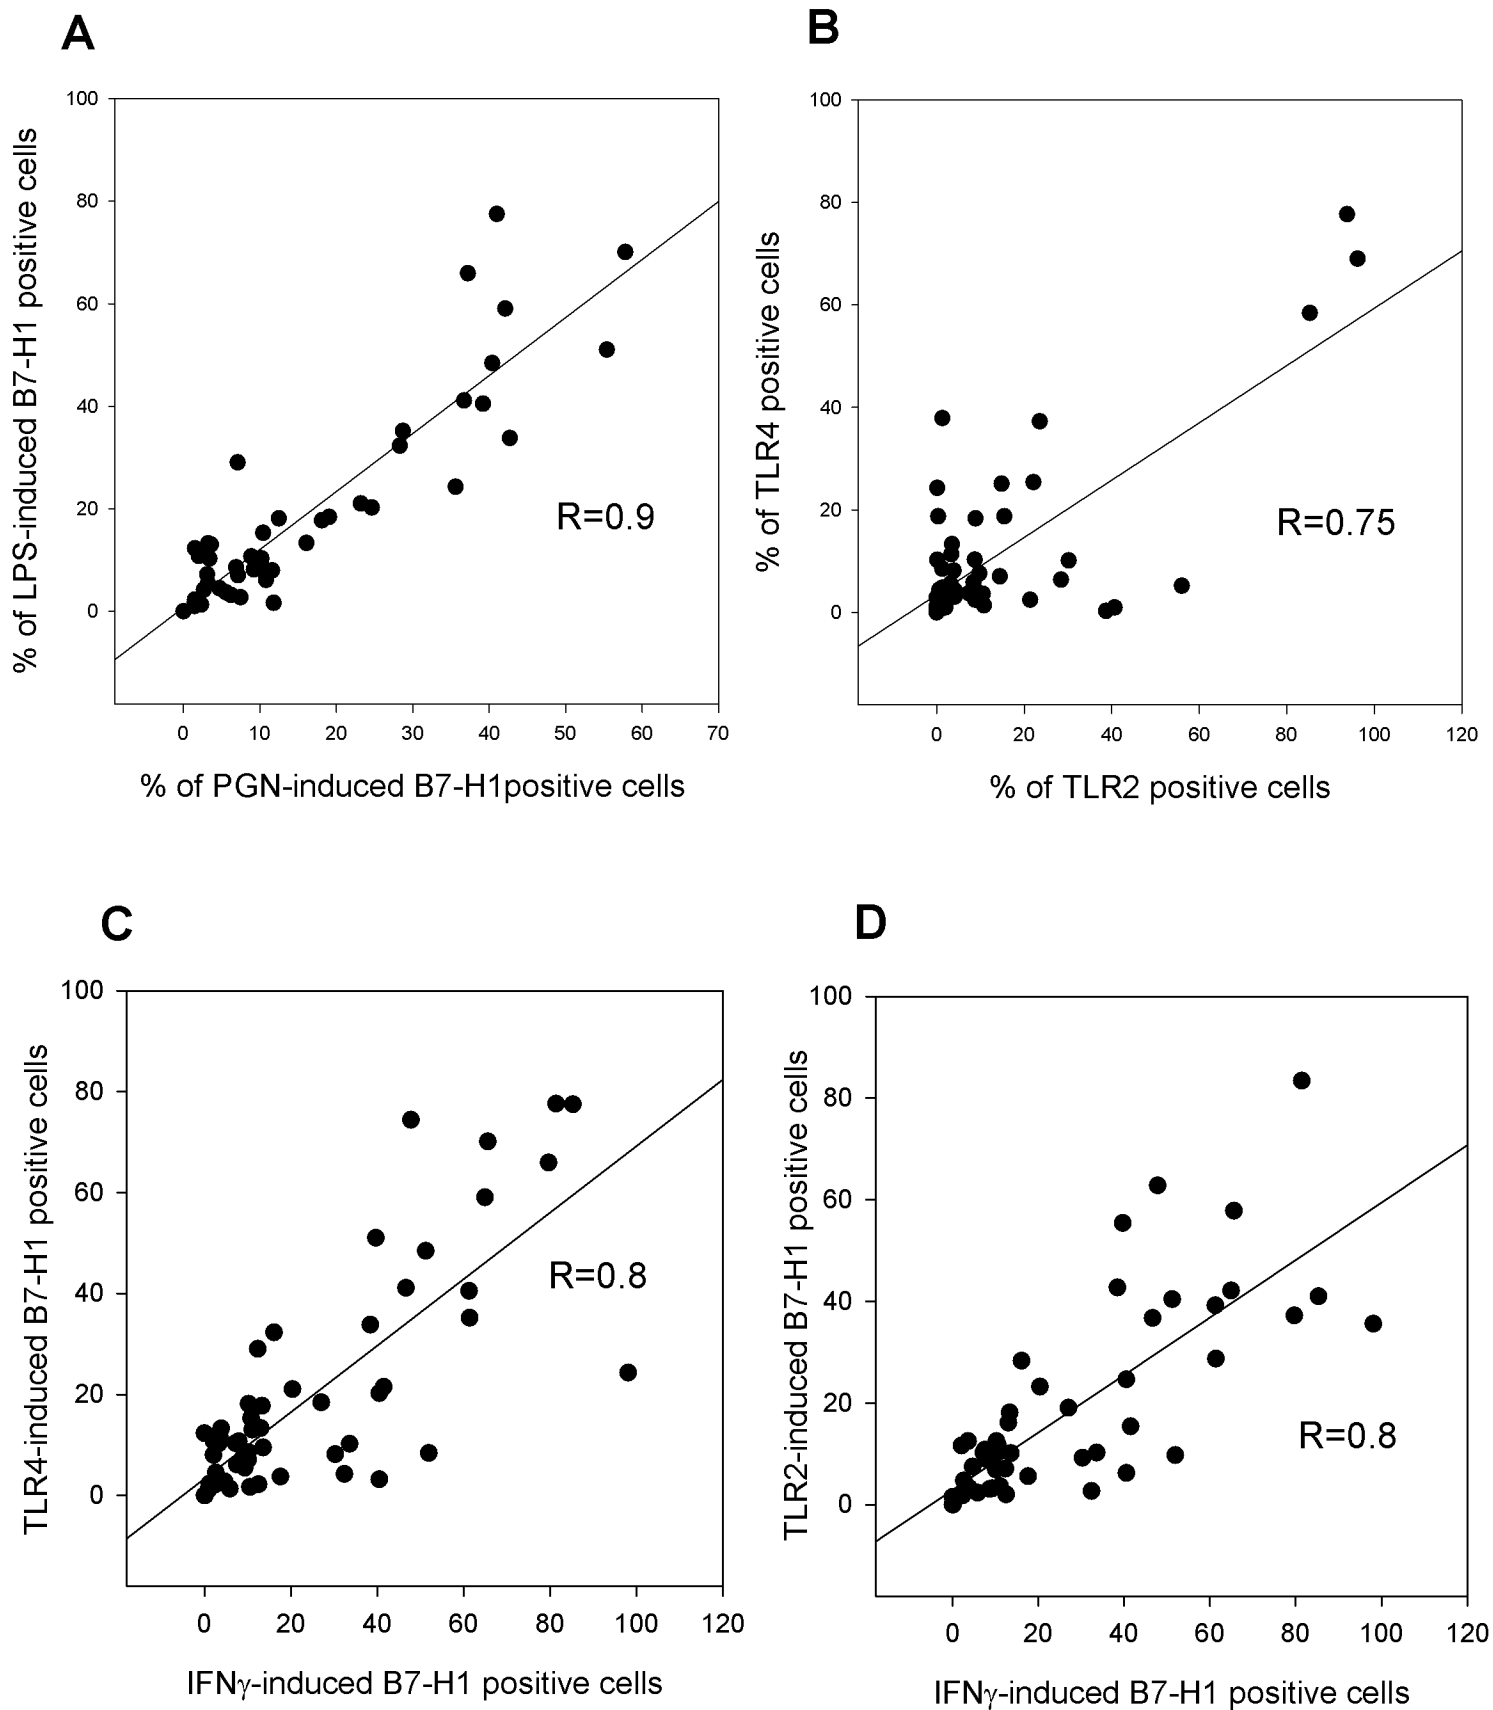

**Supplementary Figure S1:** Correlations between: (A) PGN- and LPS-induced B7-H1 expression in AML blast cells (n=55). (B) TLR2 and TLR4 expression in AML blast cells. (C) IFN $\gamma$ - and TLR4-induced B7-H1 expression. (D) IFN $\gamma$ - and TLR2-induced B7-H1 expression (Pearson's correlation).
